# Supplementary material for: Cardiomyocyte-enriched USP20 ameliorates pathological cardiac hypertrophy by targeting STAT3-CARM1 axis
Source: Research Square preprint supplement (doi:10.21203/rs.3.rs-5264946/v1), 2024-10-25
Supplement: Supplementary file 1 [file 5c16085f4e695ee4275a9768.docx]

SUPPLEMENTARY TABLES for

Cardiomyocyte-enriched USP20 ameliorates pathological cardiac hypertrophy by targeting STAT3-CARM1 axis

Lingfeng Zhong1,2,3, Shanshan Dai4, Fan Yu1,2,3, Guo-Ping Shi5, Qinyan Gong1,2,3, Yucong Zhang6, Jingsi Duan1,2,3, Zhengyin Lou1,2,3，Zhixuan Tang6, Fuzhe Gong1,2,3, Derong Chen 1,2,3, Liya Hou1,2,3, Xinyang Hu1,2,3, Jinghai Chen1,2,3,7✉, Jian’an Wang1,2,3✉and Deling Yin1,2,3✉

Correspondence: Jinghai Chen ([Jinghaichen@zju.edu.cn](mailto:Jinghaichen@zju.edu.cn)) or Jian’an Wang (wangjianan111@ zju.edu.cn) or Deling Yin (yindl@zju.edu.cn)

**SUPPLEMENTARY TABLES**

**Supplementary Table 1**: The clinical characteristics of the patients.

| **Group** | **No.** | **Age** | **Sex** |
| --- | --- | --- | --- |
| Control samples  (Normal donors without heart failure) | 1  2  3 | 50  38  54 | Male  Male  Male |
| Heart failure | 1  2  3 | 65  42  61 | Male  Male  Male |

**Supplementary Table 2:** Sequences of primers for real-time qPCR assay used in study.

| **Gene** | **Species** | **Sequence (Forward)** | **Sequence (Reverse)** |
| --- | --- | --- | --- |
| Usp20 | Mouse | GCCTTCATCGTGGAGTACATCAGAC | CAGCAGCAAAGAAAGCAGCAAGG |
| Anp | Mouse | AAGAACCTGCTAGACCACCTGGAG | TGCTTCCTCAGTCTGCTCACTCAG |
| Myh7 | Mouse | CAGAACACCAGCCTCATCAACCAG | CACAGCTTCTCTTTGATGTCAC |
| Col-1a1 | Mouse | TGGCCTTGGAGGAAACTTTG | CACAGCTTCTCTTTGATGTCAC |
| Tgf-β | Mouse | CCAGATCCTGTCCAAACTAAGG | CACAGCTTCTCTTTGATGTCAC |
| Stk3 | Mouse | CCAAACGGCATGAAGAGCAGCA | CTCCTTCACTCATCGTGCTGGT |
| Pten | Mouse | TTTGAAGACCATAACCCACCACAG | TTACACCAGTCCGTCCCTTTCC |
| Eno1 | Mouse | TACCGCCACATTGCTGACTTGG | GCTTGTTGCCAGCATGAGAACC |
| Atf4 | Mouse | AACCTCATGGGTTCTCCAGCGA | CTCCAACATCCAATCTGTCCCG |
| Alkbh5 | Mouse | TCGGAACCTGTGCTTTCTCTGC | CTTCCTGAGAATGATGACCGCC |
| Carm1 | Mouse | ACAGGCTCCAAGTCCAGTAACC | GCTGCTGAGATTATAGGTGCTTCC |
| Pcna | Mouse | CAAGTGGAGAGCTTGGCAATGG | GCAAACGTTAGGTGAACAGGCTC |
| β-actin | Mouse | CCGTGAAAAGATGACCCAGA | TACGACCAGAGGCATACAG |
| Usp20 | Rat | GCAAGTGGATGAGGACGCTGATG | GTGGACTTCATTGTCTGGCTCTGG |
| Anp | Rat | GGGCTCCTTCTCCATCACC | CTCCAATCCTGTCAATCCTACC |
| Myh7 | Rat | GAGGAGAGGGCGGACATT | ACTCTTCATTCAGGCCCTTG |
| β-actin | Rat | CCTAGACTTCGAGCAAGAGA | GGAAGGAAGGCTGGAAGA |
| Usp20 | Human | TTCTACAGGAAGAGCAGCGAGGAG | GCGAAGGTGTTGAACTTGTTGAGC |
| β-actin  Carm1 promoter | Human  Mouse | CCTGGCACCCAGCACAAT  CAAGCATTGCCTCCTGAAACG | GCCGATCCACACGGAGTACT  GAGGCGGTGCTTAGCCTTC |
|  |  |  |  |

**Supplementary Table 3:** Biometric and echocardiographic parameters in Ang II-challenged mouse experiment.

| **Model 1 (Ang II model)** | **Veh** | | **Ang II** | |
| --- | --- | --- | --- | --- |
| **Parameter** | **USP20fl/fl** | **USP20 CKO** | **USP20fl/fl** | **USP20 CKO** |
|  | **n=6** | **n=6** | **n=6** | **n=6** |
| Heart rate,(bpm) | 492±55 | 479±48ns | 472±38ns | 474±38NS |
| Diameter;s, (mm) | 1.85±0.29 | 2.6±0.32** | 2.86±0.29** | 3.91±0.39### |
| Diameter;d, (mm) | 2.94±0.28 | 3.47±0.36ns | 3.80±0.42** | 4.61±0.35## |
| LVAW;s, (mm) | 1.12±0.11 | 1.15±0.04ns | 1.21±0.09ns | 1.30±0.05NS |
| LVAW;d, (mm) | 0.74±0.08 | 0.62±0.08ns | 0.77±0.08ns | 0.92±0.21NS |

ns and *, represents USP20CKO + Veh group or USP20fl/fl + Ang II group compared with USP20fl/fl + Veh group. ns, no significance. ***P*＜.01. NS and #, represents USP20CKO + Ang II group compared with USP20fl/fl + Ang II group. NS, no significance. ## *P*＜0.01, ###, *P*＜.001.

**Supplementary Table 4:** Biometric and echocardiographic parameters in TAC operation mice

| **Model 2 (TAC model)** | **Sham** | | **TAC** | |
| --- | --- | --- | --- | --- |
| **Parameter** | **USP20fl/fl** | **USP20 CKO** | **USP20fl/fl** | **USP20 CKO** |
|  | **n=6** | **n=6** | **n=6** | **n=6** |
| Heart rate,(bpm) | 499±40 | 515±39ns | 552±20ns | 519±70NS |
| Diameter;s, (mm) | 2.23±0.19 | 2.44±0.28ns | 2.91±0.19** | 3.06±0.48NS |
| Diameter;d, (mm) | 3.40±0.22 | 3.60±0.26ns | 3.87±0.20* | 4.00±0.32NS |
| LVAW;s, (mm) | 1.42±0.16 | 1.14±0.12ns | 1.23±0.18ns | 1.36±0.13NS |
| LVAW;d, (mm) | 0.70±0.10 | 0.74±0.19ns | 0.84±0.12ns | 0.93±0.18NS |

ns and *, represents USP20CKO + Sham group or USP20fl/fl + TAC group compared with USP20fl/fl + Sham group. ns, no significance., **P*＜.05, **, *P*＜.01. NS and #, represents USP20CKO + TAC group compared with USP20fl/fl + TAC group. NS, no significance.

**Supplementary Table 5:** Biometric and echocardiographic parameters in Ang II infusion mice with AAV9.

| **Model 3 (AAV)** | **Veh** | **Ang II** | |
| --- | --- | --- | --- |
| **Parameter** | **WT**  **EV**  **n=6** | **WT**  **EV**  **n=6** | **WT**  **USP20OE**  **n=6** |
| Heart rate,(bpm) | 512±39 | 513±40ns | 509±28NS |
| Diameter;s, (mm) | 2.08±0.11 | 2.52±0.34* | 2.30±0.28NS |
| Diameter;d, (mm) | 3.20±0.22 | 3.76±0.24** | 3.32±0.33# |
| LVAW;s, (mm) | 1.18±0.12 | 1.33±0.13ns | 1.28±0.13NS |
| LVAW;d, (mm) | 0.75±0.10 | 0.94±0.10* | 0.89±0.12NS |

ns and *, represents WT+EV+Ang II compared with WT+EV+Veh. ns, no significance., **P*＜.05, ***P*＜.01. NS and #, represents WT+USP20OE+Ang II compared with WT+EV+Ang II. NS, no significance., #*P*＜.05.

**Supplementary Table 6:** Biometric and echocardiographic parameters in Ang II infusion USP20 CKO mice with stattic and AAV9

| **Model 4 (Stattic)** | **Ang II** | | |
| --- | --- | --- | --- |
| **Parameter** | **USP20 CKO**  **Veh+EV**  **n=6** | **USP20 CKO**  **Stattic+EV**  **n=6** | **USP20 CKO**  **Stattic+USP20OE**  **n=6** |
| Heart rate,(bpm) | 424±52 | 410±68ns | 401±56NS |
| Diameter;s, (mm) | 3.40±0.49 | 2.79±0.65ns | 2.76±0.41NS |
| Diameter;d, (mm) | 4.12±0.62 | 3.72±0.70ns | 3.73±0.23NS |
| LVAW;s, (mm) | 1.39±0.16 | 1.19±0.15ns | 1.18±0.16NS |
| LVAW;d, (mm) | 0.99±0.14 | 0.80±0.08* | 0.82±0.05NS |

ns and *, represents USP20 CKO+Stattic+EV+Ang II compared with USP20 CKO+Veh+EV+Ang II. ns, no significance., * *P*＜.05; NS and #, represents USP20 CKO+Stattic+USP20OE+Ang II compared with USP20 CKO+Stattic+EV+Ang II. NS, no significance.

**Supplementary Table 7. Antibody information.**

| **Antibodies** | **Manufacturer** | **Cat. No.** | **Source** | **Application(s) and Dilution** |
| --- | --- | --- | --- | --- |
| USP20 | Abcam | ab72225 | rabbit | WB (1:1000)  Co-IP (2 µg per 500 µg of total protein),  IF (1:100) |
| UB | Abcam | ab134953 | rabbit | WB (1:1000) |
| UB-K63 | Abcam | ab-179434 | mouse | WB (1:1000), |
| β-MYHC | Abcam | ab172967 | rabbit | WB (1:1000), |
| Lamin B | Abcam | ab133741 | rabbit | WB (1:1000) |
| α-actinin | Abcam | ab68167 | mouse | IF(1:200) |
| Vimentin | Abcam | ab8978 | mouse | IF(1:200) |
| CD68 | Abcam | ab283654 | mouse | IF(1:200) |
| STAT3 | Cell Signaling Technology | 12640S | rabbit | WB (1:1000)  Co-IP (2 µg per 500 µg of total protein),  IF (1:100)  Cut&Tag (1:200) |
| Tyr705-STAT3 | Cell Signaling Technology | 9145S | rabbit | WB (1:1000) |
| GAPDH | Cell Signaling Technology | 5174 | rabbit | WB (1:1000), |
| ANP | Proteintech | 27426-1-AP | rabbit | WB (1:1000), |
| His | Proteintech | 6005-1-Ig | rabbit | Co-IP (2 µg per 500 µg of total protein) |
| Flag | Proteintech | 20543-1-AP | rabbit | WB (1:1000)  Co-IP (2 µg per 500 µg of total protein) |
| HA | Proteintech | 51064-2-AP | rabbit | WB (1:1000)  Co-IP (2 µg per 500 µg of total protein) |
| TNNT2 | Proteintech | 15513-1-AP | rabbit | WB (1:1000) |
